# Supplementary material
Source: PubMed Central journal article supplement (PMC8250526)
Supplement: JGS-69-1740-s001.pdf [file JGS-69-1740-s001.pdf]

SUPPLEMENTARY TABLE S1

Number of Program Subscriptions to Aquifer Geriatrics by Health Profession

|              | <b>AY 2019-2020<br/>Subscribing Programs<br/>(% of total)</b> | <b>AY 2020-2021<br/>Subscribing Programs<br/>(% of total)</b> | <b>% Increase from<br/>AY 2019-2020 to<br/>AY 2020-2021</b> |
|--------------|---------------------------------------------------------------|---------------------------------------------------------------|-------------------------------------------------------------|
| MD           | 27 (52%)                                                      | 94 (43%)                                                      | 248%                                                        |
| DO           | 4 (8%)                                                        | 17 (8%)                                                       | 325%                                                        |
| NP           | 4 (8%)                                                        | 20 (9%)                                                       | 400%                                                        |
| PA           | 3 (6%)                                                        | 71 (32%)                                                      | 2267%                                                       |
| Res/Fel/Misc | 14 (27%)                                                      | 17 (8%)                                                       | 21%                                                         |
| <b>Total</b> | <b>52</b>                                                     | <b>219</b>                                                    | <b>321%</b>                                                 |
